# Supplementary material for: Assembly of protonated mesoporous carbon nitrides with co-catalytic [Mo3S13]2− clusters for photocatalytic hydrogen production
Source: Royal Society of Chemistry journal article supplement (doi:10.1039/c7cc07805f), 2017-01-01
Supplement: c7cc07805f1.pdf [file c7cc07805f1.pdf]

## Electronic Supplementary Information

### Experimental materials

All the reagents used are analysis grades without further purification.  $(\text{NH}_4)_6\text{Mo}_7\text{O}_{24} \cdot 4\text{H}_2\text{O}$  (Sigma-Aldrich), ammonium polysulfide solution (<25%wt) are purchased from China Sinopharm Chemical reagent Co. Ltd., Toluene (anhydrous, 99.9%), ethanol (anhydrous, 99.9%), Pluronic P123 (Sigma), tetraethylorthosilicate (TEOS, Sigma, 98%), HCl solution (anhydrous, 37%),  $\text{NH}_4\text{HF}_2$  (anhydrous),

### Experimental Section

**Synthesis of  $(\text{NH}_4)_2\text{Mo}_3\text{S}_{13} \cdot n\text{H}_2\text{O}$ :** 4.0 g of  $(\text{NH}_4)_6\text{Mo}_7\text{O}_{24} \cdot 4\text{H}_2\text{O}$  (Sigma-Aldrich) was dissolved in 20 ml of water in an Erlenmeyer flask. An ammonium polysulfide solution (120 ml, <25%wt) as added and the flask was covered with a watch glass. The solution was then kept on an oil bath (96 °C) for five days without stirring. Dark-red crystals of  $(\text{NH}_4)_2\text{Mo}_3\text{S}_{13} \cdot n\text{H}_2\text{O}$  precipitated and were removed by filtering, followed by washing successively with water and ethanol. To remove excess sulfur, the  $(\text{NH}_4)_2\text{Mo}_3\text{S}_{13} \cdot n\text{H}_2\text{O}$  crystals were heated in hot toluene ( $\sim 80^\circ\text{C}$ ) for 2–4 hours. Finally, the crystals were dried in air.

**Synthesis of SBA-15 Silica:** SBA-15 silica was obtained using Pluronic P123 and tetraethylorthosilicate (TEOS, 98%) as the starting materials. In a typical preparation, TEOS (5.58 g) was mixed with P123 (3.46 g) in 1.6 M HCl solution (38 mL) and stirred at 35 °C for 24 h. The mixture was heated at 150 °C for 24 h in static conditions in a Tefl on-lined

autoclave. The resulting white precipitate was removed by filtration and dried at 80°C overnight; it was then further calcined at 550°C in air for 4 h with a heating rate of 1 °Cmin<sup>-1</sup>.

**Synthesis of om-CN:** First, the as-prepared SBA-15 silica was acidified using 1 M HCl solution (1.0 g silica/20.0 mL HCl) at 80°C for 24 h, followed by drying at 80°C for 12 h. Then, 1.0 g HCl-treated SBA-15 silica was added to 8 g liquid CA, and kept under sonication and vacuum at 55°C for 4 h. Third, 15.0 mL water was added to the mixture, which was then centrifuged, dried, and calcined at 550°C for 4 h. The resulting powder was treated with 4 M NH<sub>4</sub>HF<sub>2</sub> solution (40 mL) for 24 h to remove the silica template, followed by filtration, washing with water and ethanol several times, and finally drying at 80°C.

**Synthesis of pom-CN:** The typical protonation was undertaken by stirring om-CN (0.5 g) with 10mL (3, 6, 8, 12 mol/L) HCl for 4 hours in room temperature, centrifugal washing with water until neutral condition and drying at 105°C in air overnight.

**Synthesis of MS/pom-CN:** First, 25mg of (NH<sub>4</sub>)<sub>2</sub>Mo<sub>3</sub>S<sub>13</sub>.nH<sub>2</sub>O was dispersed in 100ml methanol. Then, 50mg of pom-CN or was mixed with different amounts of (NH<sub>4</sub>)<sub>2</sub>Mo<sub>3</sub>S<sub>13</sub>.nH<sub>2</sub>O methanol solution with stirring at room temperature for 10min. Subsequently, dried by a vacuum process to remove the methanol solution.

**Characterization:** The morphology of the sample was investigated by field emission scanning electron microscopy (SEM) (JSM-6700F). Transmission electron microscopy (TEM) was obtained by Zeis 912 microscope. The nitrogen adsorption–desorption isotherms were collected at 77 K using Micromeritics ASAP 2020 Surface Area and Porosity Analyzer. Powder X-ray diffraction (XRD) measurements were performed on Bruker D8 Advance diffractometer with Cu Ka1 radiation ( $k = 1.5406 \text{ \AA}$ ). Fourier transformed infrared (FTIR)

spectra were recorded on BioRad FTS 6000 spectrometer. X-ray photoelectron spectroscopy (XPS) data were obtained on Thermo ESCALAB250 instrument with a monochromatized Al K $\alpha$  line source (200 W). UV–Vis diffuse reflectance spectra (UV–Vis DRS) were performed on Varian Cary 500 Scan UV–visible system. Electrochemical measurements were conducted with a BAS Epsilon Electrochemical System in a conventional three electrode cell, using a Pt plate as the counter electrode and an Ag/AgCl electrode (3M KCl) as the reference electrode. The working electrode was prepared on indium-tin oxide (ITO) glass that was cleaned by sonication in ethanol for 30 min and dried at 353 K. The boundary of ITO glass was protected using Scotch tape. The 5 mg sample was dispersed in 1 mL of ethanol by sonication to get a slurry. The slurry was spread onto pretreated ITO glass. After air-drying, the Scotch tape was unstuck, and the uncoated part of the electrode was isolated with epoxy resin. The electrolyte was a 0.5 molL<sup>-1</sup> Na<sub>2</sub>SO<sub>4</sub> (pH = 6.8) aqueous solution without additive and was purged with nitrogen gas for 30 min prior to the measurements. The electrochemical experiments were taken on a ZAHNER Zennium workstation.

***Photocatalytic hydrogen evolution:*** Photocatalytic H<sub>2</sub> production was carried out in a Pyrex top-irradiation reaction vessel connected to a glass-closed gas circulation system. For each reaction, 50 mg catalyst powder was dispersed in an aqueous solution (100 mL) containing lactic acid (10 vol%) as sacrificial electron donor. The reactant solution was evacuated several times to remove air completely prior to irradiation under a 300W Xe lamp and a water-cooling filter. The wavelength of the incident light was controlled by using an appropriate long pass cut-off filter. The temperature of the reactant solution was maintained at room temperature by a flow of cooling water during the reaction. The evolved gases were

analyzed by gas chromatography equipped with a thermal conductive detector (TCD) with argon as the carrier gas.

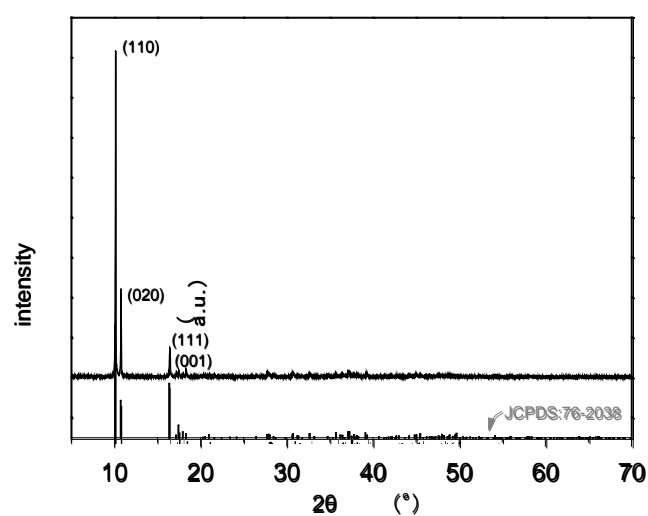

Fig.S1 Powder XRD pattern of  $(\text{NH}_4)_2\text{Mo}_3\text{S}_{13} \cdot n\text{H}_2\text{O}$  with a simulated reference spectrum of the  $(\text{NH}_4)_2\text{Mo}_3\text{S}_{13} \cdot n\text{H}_2\text{O}$  crystal structure displayed at the bottom (Joint Commission for Powder Diffraction Standards (JCPDS):#76-2038).

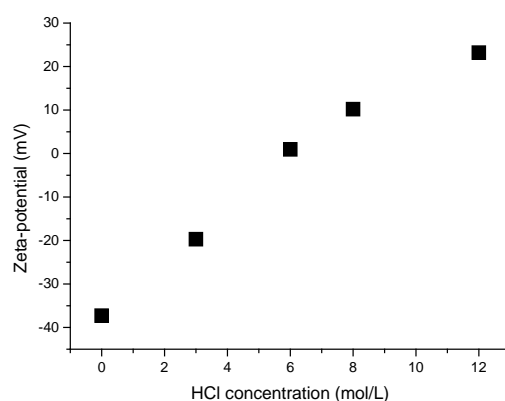

Fig.S2 Zeta potential of pom- $\text{C}_3\text{N}_4$  with respect to HCl concentration.

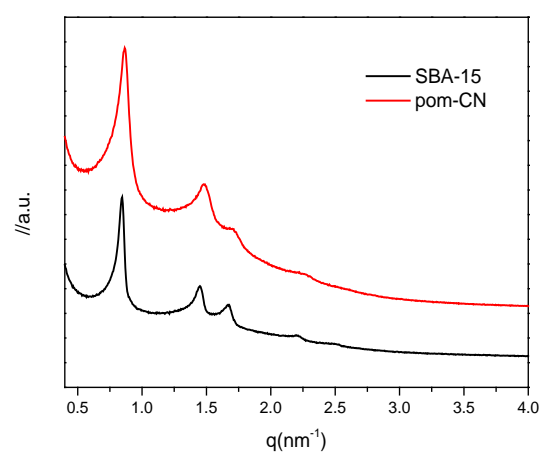

Fig.S3 SAXS patterns of pom-CN and SBA-15 silica.

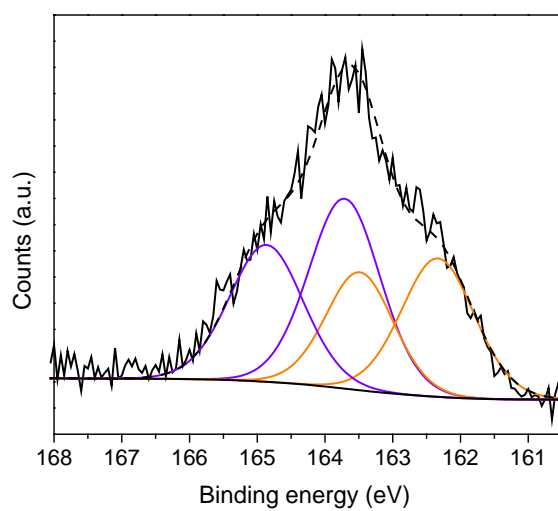

Fig.S4 XPS spectra (S 2p region) and fitted peaks of 1 wt% MS/pom-CN after photocatalytic hydrogen production test.

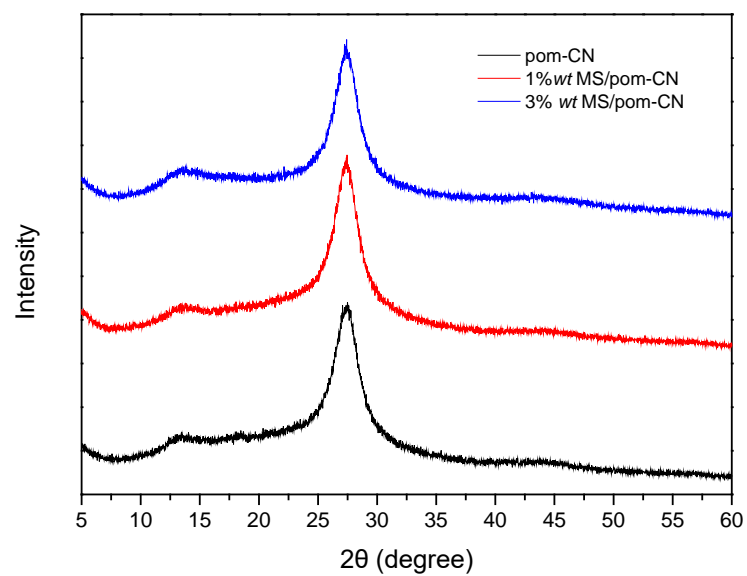

Fig.S5 XRD patterns of pom-CN and MS/pom-CN.

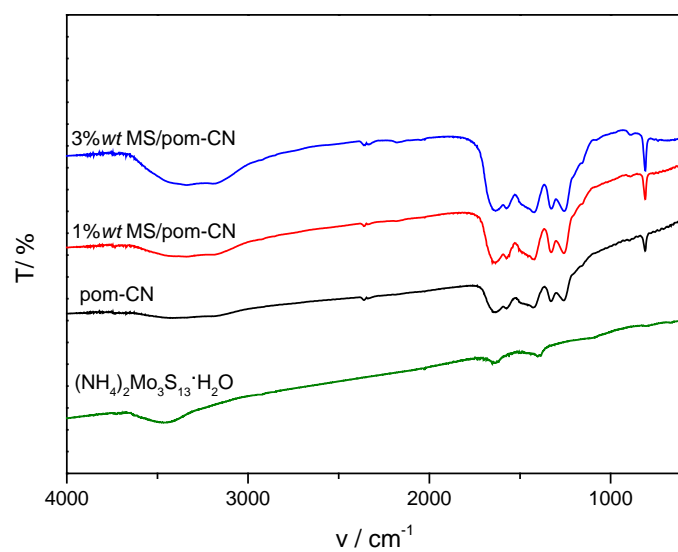

Fig.S6 FT-IR spectra of pom-CN, MS and MS/pom-CN.

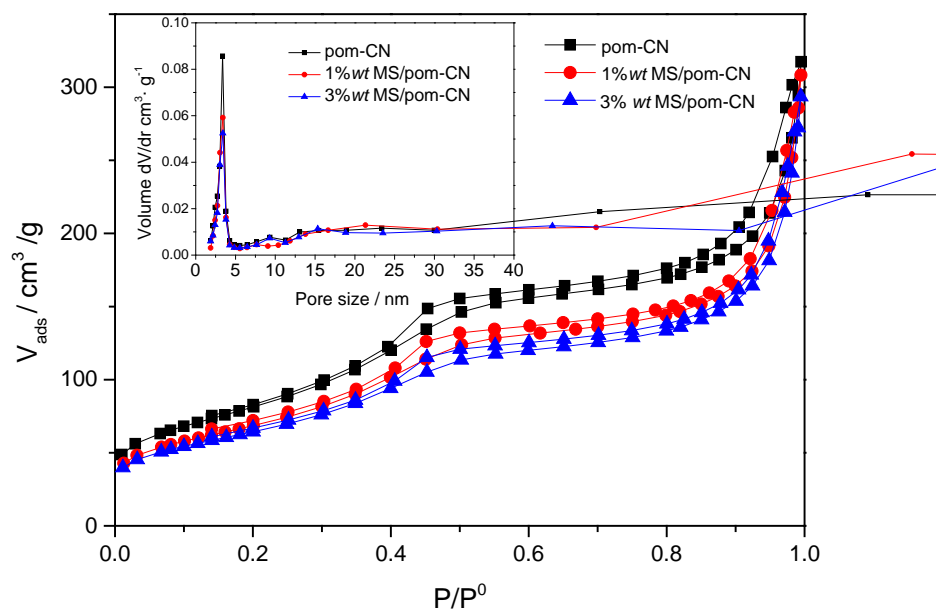

Fig.S7 Nitrogen-sorption isotherms of pom-CN and MS/pom-CN; inset: corresponding BJH pore-size distribution of pom-CN and MS/pom-CN.

Table S1 Physicochemical properties of pom-CN, 1%wt MS/pom-CN and 3%wt MS/pom-CN samples from nitrogen adsorption-desorption analysis.

| catalysts       | SA <sup>[a]</sup><br>(m <sup>2</sup> g <sup>-1</sup> ) | PV <sup>[b]</sup><br>[cm <sup>3</sup> g <sup>-1</sup> ] |
|-----------------|--------------------------------------------------------|---------------------------------------------------------|
| pom-CN          | 298                                                    | 0.49                                                    |
| 1wt% MS/pom-CN  | 249                                                    | 0.47                                                    |
| 3wt% MS/ pom-CN | 234                                                    | 0.45                                                    |

[a] the surface area; [b] pore volume.

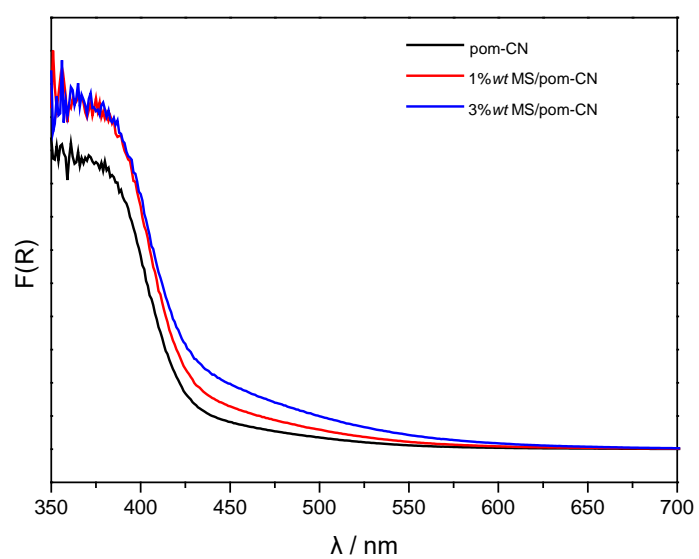

Fig.S8 UV-Vis absorption spectrum of pom-CN and MS/pom-CN.

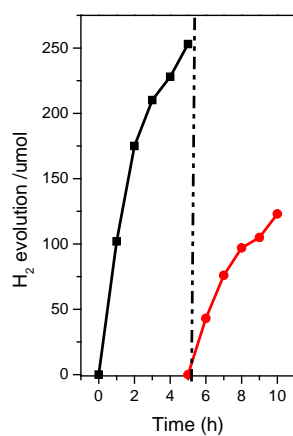

Fig.S9 The photocatalytic hydrogen-evolution stability of the 1%wt MS/pom-CN using triethanolamine as a sacrificial agent.
